# Supplementary material
Source: publisher site journal article supplement (https://www.dovepress.com/article/556187)

**Appendices:**


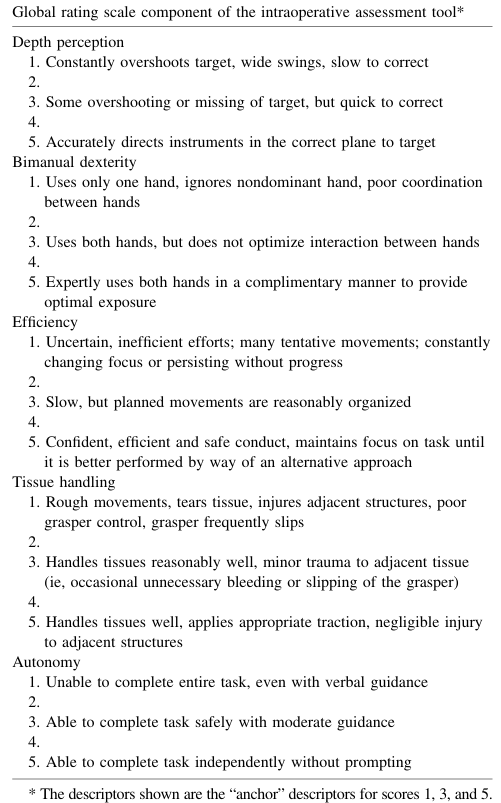
**Appendix A**

Supplement: Supplementary file 1 [file 556187%20Revised%20Supplementary%20materials.docx]
